# Supplementary material for: Retrospective review using targeted deep sequencing reveals mutational differences between gastroesophageal junction and gastric carcinomas
Source: BMC Cancer. 2015 Feb 6;15:32. doi: 10.1186/s12885-015-1021-7 (PMC4322811; doi:10.1186/s12885-015-1021-7)
Supplement: Additional file 2: Table S2. — Clinicopathologic data for the 167 cases in this series, including site, stage, margin status, immunohistochemistry and survival. [file 12885_2015_1021_MOESM2_ESM.xls]

## Sheet: Sheet1
ID	Stomach_or GEJ	Lauren_Type	Shah_et_al_Type	T_Stage	N_Stage	AJCC Stage	Grade	Margin Involvement	Her2_Amplification	ARID1a_Loss	p53_IHC	MMR_Proteins	Recurrence	Death	Disease_Free_Survival_Months	Overall_Survival_Months
RH10-135	GEJ	Intestinal	Proximal_NON_Diffuse	3	1	2	2	N	N	Intact	Overexpressed	Intact	Y	Y	10	33
RH10-136	Stomach	Diffuse	Diffuse	2	1	2	3	N	N	Intact	Overexpressed	Intact	N	Y	63	63
RH10-145	Stomach	Diffuse	Diffuse	1	0	1	3	N	N	Intact	Absent	Intact	N	N	15	15
RH10-175	GEJ	Intestinal	Proximal_NON_Diffuse	1	1	1	2	N	N	Intact	Overexpressed	Intact	Y	Y	15	17
RH10-176	GEJ	Intestinal	Proximal_NON_Diffuse	1	1	1	2	N	N	Lost	Absent	Intact	N	N	1	1
RH10-177	GEJ	Intestinal	Proximal_NON_Diffuse	1	1	1	1	N	Y	Intact	Absent	Intact	N	Y	0	19
RH10-178	Stomach	Diffuse	Diffuse	1	1	1	3	N	N	Intact	Overexpressed	Intact	Y	Y	27	31
RH10-179	Stomach	Diffuse	Diffuse	2	0	1	2	N	N	Lost	Absent	Loss	N	Y	3	3
RH10-180	Stomach	Intestinal	Distal_NON_Diffuse	2	0	1	3	N	N	Intact	Normal	Intact	N	N	44	44
RH10-181	GEJ	Intestinal	Proximal_NON_Diffuse	2	0	1	2	N	N	Intact	Absent	Intact	N	N	21	21
RH10-182	GEJ	Diffuse	Diffuse	2	0	1	3	N	N	Intact	Absent	Intact	Y	Y	7	9
RH10-183	GEJ	Diffuse	Diffuse	2	0	1	3	N	N	Lost	Absent	Loss	N	N	24	24
RH10-184	GEJ	Intestinal	Proximal_NON_Diffuse	2	0	1	2	N	Y	Intact	Overexpressed	Loss	N	Y	10	10
RH10-185	Stomach	Intestinal	Distal_NON_Diffuse	2	0	1	3	N	N	Lost	Absent	Loss	N	N	11	11
RH10-186	Stomach	Diffuse	Diffuse	2	1	2	3	N	N	Intact	Absent	Loss	N	N	35	35
RH10-191	Stomach	Intestinal	Distal_NON_Diffuse	1	0	1	1	N	Y	Intact	Absent	Intact	N	N	4	4
RH10-193	Stomach	Intestinal	Distal_NON_Diffuse	2	0	1	1	N	N	Intact	Absent	Intact	N	N	31	31
RH10-194	GEJ	Intestinal	Proximal_NON_Diffuse	2	1	2	2	Y	N	Lost	Normal	Intact	N	N	6	6
RH10-195	GEJ	Mixed	Proximal_NON_Diffuse	2	1	2	3	N	N	Intact	Overexpressed	Intact	Y	Y	27	44
RH10-196	Stomach	Diffuse	Diffuse	2	1	2	3	N	N	Lost	Absent	Loss	N	N	33	33
RH10-197	Stomach	Diffuse	Diffuse	2	1	2	3	N	N	Intact	Absent	Loss	N	N	26	26
RH10-198	Stomach	Intestinal	Distal_NON_Diffuse	2	1	2	3	N	N	Intact	Absent	Intact	Y	Y	4	5
RH10-199	GEJ	Intestinal	Proximal_NON_Diffuse	2	1	2	2	N	N	Intact	Overexpressed	Intact	N	Y	52	52
RH10-200	Stomach	Mixed	Distal_NON_Diffuse	2	1	2	2	N	N	Intact	Overexpressed	Intact	Y	Y	17	24
RH10-201	GEJ	Intestinal	Proximal_NON_Diffuse	2	1	2	3	N	N	Intact	Overexpressed	Loss	Y	Y	8	20
RH10-209	GEJ	Diffuse	Diffuse	1	0	1	1	N	N	Lost	Overexpressed	Loss	N	N	2	2
RH10-218	Stomach	Mixed	Distal_NON_Diffuse	2	1	2	2	N	N	Lost	Absent	Intact	N	N	28	28
RH10-221	GEJ	Intestinal	Proximal_NON_Diffuse	2	1	2	2	N	N	Intact	Absent	Intact	N	N	35	35
RH10-222	Stomach	Mixed	Distal_NON_Diffuse	2	2	2	2	N	N	Intact	Absent	Loss	N	Y	9	9
RH10-223	GEJ	Intestinal	Proximal_NON_Diffuse	3	0	2	3	N	N	Intact	Normal	Intact	N	Y	6	6
RH10-224	Stomach	Intestinal	Distal_NON_Diffuse	4	1	3	2	N	N	Intact	Normal	Intact	N	Y	18	18
RH10-225	GEJ	Intestinal	Proximal_NON_Diffuse	2	1	2	2	N	N	Intact	Normal	Intact	Y	Y	26	30
RH10-226	Stomach	Intestinal	Distal_NON_Diffuse	2	1	2	3	N	N	Intact	Overexpressed	Intact	Y	Y	23	27
RH10-227	Stomach	Diffuse	Diffuse	2	1	2	3	N	N	Lost	Absent	Intact	Y	Y	31	48
RH10-228	GEJ	Intestinal	Proximal_NON_Diffuse	2	2	2	3	N	N	Lost	Overexpressed	Intact	Y	Y	18	20
RH10-229	GEJ	Mixed	Proximal_NON_Diffuse	2	2	2	2	Y	N	Lost	Normal	Intact	N	N	31	31
RH10-231	GEJ	Intestinal	Proximal_NON_Diffuse	3	0	2	3	N	N	Intact	Overexpressed	Intact	Y	Y	21	40
RH10-232	GEJ	Intestinal	Proximal_NON_Diffuse	3	0	2	3	N	N	Intact	Absent	Intact	N	N	55	55
RH10-233	Stomach	Diffuse	Diffuse	3	0	2	2	Y	N	Lost	Absent	Loss	N	N	30	30
RH10-234	GEJ	Intestinal	Proximal_NON_Diffuse	3	0	2	2	N	N	Intact	Overexpressed	Intact	Y	Y	30	32
RH10-255	GEJ	Mixed	Proximal_NON_Diffuse	3	1	2	3	N	N	Lost	Normal	Loss	N	N	9	9
RH10-256	GEJ	Mixed	Proximal_NON_Diffuse	3	1	2	3	N	N	Intact	Absent	Intact	Y	Y	28	31
RH10-257	Stomach	Diffuse	Diffuse	3	1	2	3	N	N	Lost	Absent	Loss	Y	Y	27	37
RH10-258	GEJ	Intestinal	Proximal_NON_Diffuse	3	1	2	2	N	N	Intact	Overexpressed	Intact	Y	Y	20	30
RH10-266	Stomach	Diffuse	Diffuse	4	2	3	3	Y	Y	Intact	Absent	Intact	Y	N	11	19
RH10-273	Stomach	Diffuse	Diffuse	3	1	2	3	N	N	Intact	Absent	Intact	Y	Y	18	23
RH10-277	Stomach	Intestinal	Distal_NON_Diffuse	2	0	1	2	N	N	Intact	Absent	Intact	N	Y	25	25
RH10-289	GEJ	Intestinal	Proximal_NON_Diffuse	3	1	2	2	N	N	Intact	Normal	Intact	Y	Y	26	76
RH10-290	Stomach	Intestinal	Distal_NON_Diffuse	3	1	2	3	N	N	Intact	Absent	Intact	N	N	37	37
RH10-291	Stomach	Mixed	Distal_NON_Diffuse	3	1	2	3	Y	N	Intact	Absent	Intact	Y	Y	44	47
RH10-292	GEJ	Intestinal	Proximal_NON_Diffuse	3	1	2	2	Y	N	Intact	Overexpressed	Intact	Y	Y	8	12
RH10-293	GEJ	Intestinal	Proximal_NON_Diffuse	3	2	3	2	N	N	Intact	Overexpressed	Intact	Y	Y	19	22
RH10-294	GEJ	Intestinal	Proximal_NON_Diffuse	3	2	3	2	N	N	Intact	Absent	Intact	Y	Y	34	59
RH10-295	GEJ	Intestinal	Proximal_NON_Diffuse	3	3	3	3	N	Y	Lost	Normal	Intact	Y	Y	8	9
RH10-296	GEJ	Intestinal	Proximal_NON_Diffuse	3	3	3	2	N	Y	Lost	Overexpressed	Intact	Y	Y	50	51
RH10-297	GEJ	Mixed	Proximal_NON_Diffuse	4	1	3	3	Y	N	Intact	Overexpressed	Intact	N	Y	6	6
RH10-298	GEJ	Intestinal	Proximal_NON_Diffuse	4	1	3	2	N	Y	Intact	Normal	Intact	Y	Y	18	45
RH10-393	GEJ	Mixed	Proximal_NON_Diffuse	3	0	2	2	N	N	Intact	Absent	Intact	Y	Y	17	18
RH10-398	Stomach	Intestinal	Distal_NON_Diffuse	1	0	1	3	N	N	Intact	Absent	Intact	N	N	14	14
RH10-408	Stomach	Mixed	Distal_NON_Diffuse	1	1	1	3	N	N	Lost	Absent	Loss	Y	Y	17	15
RH10-409	Stomach	Intestinal	Distal_NON_Diffuse	2	0	1	3	N	N	Intact	Absent	Intact	N	Y	69	69
RH10-410	Stomach	Mixed	Distal_NON_Diffuse	2	0	1	3	N	N	Intact	Absent	Intact	Y	Y	70	70
RH10-411	Stomach	Intestinal	Distal_NON_Diffuse	2	0	1	2	N	N	Lost	Normal	Loss	N	Y	51	51
RH10-412	Stomach	Intestinal	Distal_NON_Diffuse	2	0	1	2	N	N	Intact	Absent	Loss	N	N	17	17
RH10-413	GEJ	Intestinal	Proximal_NON_Diffuse	2	1	2	2	N	N	Intact	Normal	Intact	N	Y	14	14
RH10-427	Stomach	Diffuse	Diffuse	2	1	2	3	N	N	Intact	Normal	Intact	Y	Y	13	25
RH10-428	GEJ	Intestinal	Proximal_NON_Diffuse	2	1	2	3	N	N	Intact	Overexpressed	Intact	N	N	12	12
RH10-429	GEJ	Intestinal	Proximal_NON_Diffuse	2	1	2	1	N	N	Intact	Overexpressed	Intact	Y	Y	4	10
RH10-430	Stomach	Diffuse	Diffuse	3	0	2	3	N	N	Lost	Absent	Intact	N	Y	39	39
RH10-431	GEJ	Intestinal	Proximal_NON_Diffuse	3	1	2	2	N	N	Intact	Overexpressed	Intact	Y	N	15	15
RH10-432	Stomach	Intestinal	Distal_NON_Diffuse	3	1	2	2	Y	N	Lost	Overexpressed	Intact	Y	Y	0	30
RH10-433	GEJ	Intestinal	Proximal_NON_Diffuse	3	1	2	2	Y	Y	Intact	Absent	Intact	Y	Y	7	23
RH10-434	GEJ	Diffuse	Diffuse	3	2	3	3	N	N	Lost	Absent	Loss	Y	Y	17	41
RH10-436	GEJ	Intestinal	Proximal_NON_Diffuse	4	2	3	3	Y	N	Intact	Normal	Intact	N	Y	8	8
RH10-440	Stomach	Intestinal	Distal_NON_Diffuse	2	1	2	2	N	Y	Intact	Overexpressed	Intact	Y	Y	5	7
RH10-441	GEJ	Intestinal	Proximal_NON_Diffuse	2	1	2	3	N	N	Intact	Overexpressed	Intact	Y	Y	36	47
RH10-442	GEJ	Intestinal	Proximal_NON_Diffuse	2	1	2	3	N	N	Intact	Absent	Intact	N	N	36	36
RH10-443	Stomach	Intestinal	Distal_NON_Diffuse	2	1	2	3	N	N	Lost	Normal	Intact	Y	Y	21	24
RH10-444	GEJ	Intestinal	Proximal_NON_Diffuse	2	1	2	2	Y	N	Intact	Overexpressed	Intact	Y	Y	15	35
RH10-445	GEJ	Intestinal	Proximal_NON_Diffuse	1	1	1	3	N	N	Intact	Absent	Intact	Y	Y	12	25
RH10-448	Stomach	Diffuse	Diffuse	2	0	1	3	N	N	Intact	Normal	Intact	N	N	3	3
RH10-449	Stomach	Diffuse	Diffuse	3	1	2	3	N	N	Lost	Overexpressed	Loss	N	N	22	22
RH10-450	Stomach	Mixed	Distal_NON_Diffuse	3	1	2	3	N	N	Intact	Overexpressed	Intact	Y	Y	3	14
RH10-451	Stomach	Diffuse	Diffuse	3	2	3	3	N	N	Lost	Absent	Intact	Y	Y	4	19
RH10-454	Stomach	Mixed	Distal_NON_Diffuse	1	0	1	2	N	N	Intact	Absent	Intact	N	N	50	50
RH10-455	Stomach	Diffuse	Diffuse	3	0	2	3	N	N	Intact	Absent	Intact	Y	Y	14	15
RH10-456	Stomach	Intestinal	Distal_NON_Diffuse	3	1	2	1	N	Y	Intact	Overexpressed	Intact	N	Y	21	21
RH10-457	Stomach	Intestinal	Distal_NON_Diffuse	3	2	3	2	N	Y	Intact	Overexpressed	Intact	N	N	8	8
RH10-458	Stomach	Diffuse	Diffuse	3	2	3	3	N	N	Intact	Absent	Intact	N	Y	23	23
RH10-459	Stomach	Mixed	Distal_NON_Diffuse	4	2	3	3	N	N	Lost	Absent	Intact	Y	Y	13	20
RH10-461	Stomach	Mixed	Distal_NON_Diffuse	3	0	2	2	N	N	Lost	Absent	Intact	N	N	7	7
RH10-462	Stomach	Diffuse	Diffuse	3	1	2	3	N	N	Intact	Absent	Intact	Y	Y	5	9
RH10-463	Stomach	Mixed	Distal_NON_Diffuse	3	1	2	2	N	N	Intact	Absent	Loss	N	N	33	33
RH10-464	Stomach	Diffuse	Diffuse	3	1	2	3	N	N	Lost	Absent	Intact	N	N	14	14
RH10-465	Stomach	Intestinal	Distal_NON_Diffuse	3	2	3	1	Y	N	Intact	Overexpressed	Intact	N	Y	5	5
RH10-466	Stomach	Intestinal	Distal_NON_Diffuse	3	1	2	2	N	N	Lost	Normal	Loss	Y	N	12	17
RH10-476	Stomach	Intestinal	Distal_NON_Diffuse	3	0	2	2	N	N	Lost	Normal	Loss	Y	Y	18	33
RH10-478	Stomach	Intestinal	Distal_NON_Diffuse	3	1	2	3	N	N	Intact	Absent	Intact	N	N	37	37
RH10-479	Stomach	Mixed	Distal_NON_Diffuse	3	3	3	3	Y	N	Lost	Absent	Intact	Y	Y	29	33
RH10-480	Stomach	Intestinal	Distal_NON_Diffuse	3	0	2	2	N	N	Intact	Normal	Loss	N	Y	34	34
RH10-483	Stomach	Intestinal	Distal_NON_Diffuse	1	0	1	2	N	N	Lost	Normal	Intact	N	Y	21	21
RH10-485	Stomach	Intestinal	Distal_NON_Diffuse	2	0	1	2	N	N	Intact	Absent	Intact	N	N	25	25
RH10-488	Stomach	Diffuse	Diffuse	2	1	2	3	N	N	Intact	Absent	Intact	Y	Y	23	32
RH10-493	GEJ	Diffuse	Diffuse	2	1	2	3	N	N	Intact	Absent	Intact	Y	Y	6	6
RH10-494	GEJ	Intestinal	Proximal_NON_Diffuse	2	1	2	3	N	N	Lost	Absent	Loss	N	N	3	3
RH10-495	GEJ	Intestinal	Proximal_NON_Diffuse	2	1	2	3	N	N	Intact	Overexpressed	Intact	N	Y	17	17
RH10-496	GEJ	Intestinal	Proximal_NON_Diffuse	2	3	3	3	N	N	Intact	Overexpressed	Intact	N	N	12	12
RH10-497	GEJ	Intestinal	Proximal_NON_Diffuse	2	3	3	2	N	N	Lost	Normal	Intact	N	Y	4	4
RH10-498	Stomach	Intestinal	Distal_NON_Diffuse	3	0	2	2	Y	N	Intact	Absent	Intact	Y	Y	14	14
RH10-499	GEJ	Intestinal	Proximal_NON_Diffuse	3	0	2	2	N	N	Intact	Overexpressed	Intact	N	Y	55	55
RH10-500	Stomach	Intestinal	Distal_NON_Diffuse	3	0	2	3	N	N	Lost	Absent	Loss	N	N	12	12
RH10-501	GEJ	Intestinal	Proximal_NON_Diffuse	3	0	2	1	Y	N	Lost	Absent	Loss	Y	Y	9	19
RH10-502	GEJ	Diffuse	Diffuse	3	0	2	3	N	N	Intact	Absent	Intact	N	Y	58	58
RH10-503	GEJ	Intestinal	Proximal_NON_Diffuse	3	0	2	3	N	N	Intact	Normal	Intact	Y	Y	9	35
RH10-505	GEJ	Mixed	Proximal_NON_Diffuse	4	0	2	3	Y	N	Intact	Overexpressed	Intact	Y	Y	30	40
RH10-510	Stomach	Intestinal	Distal_NON_Diffuse	2	2	2	2	N	Y	Intact	Overexpressed	Intact	N	N	18	18
RH10-511	GEJ	Intestinal	Proximal_NON_Diffuse	3	2	3	3	N	N	Lost	Overexpressed	Intact	Y	Y	10	27
RH10-518	Stomach	Intestinal	Distal_NON_Diffuse	2	1	2	2	Y	Y	Intact	Overexpressed	Intact	N	Y	6	6
RH10-519	GEJ	Diffuse	Diffuse	2	2	2	3	N	Y	Intact	Overexpressed	Intact	Y	Y	3	9
RH10-520	Stomach	Intestinal	Distal_NON_Diffuse	2	2	2	3	N	Y	Intact	Normal	Intact	Y	Y	29	30
RH10-521	GEJ	Intestinal	Proximal_NON_Diffuse	2	2	2	3	N	N	Intact	Overexpressed	Intact	Y	Y	7	14
RH10-522	GEJ	Intestinal	Proximal_NON_Diffuse	3	1	2	2	N	Y	Intact	Overexpressed	Intact	Y	Y	17	23
RH10-525	GEJ	Intestinal	Proximal_NON_Diffuse	3	1	2	3	N	N	Intact	Absent	Loss	N	N	9	9
RH10-526	GEJ	Intestinal	Proximal_NON_Diffuse	3	1	2	2	N	Y	Intact	Absent	Intact	N	N	6	6
RH10-527	GEJ	Intestinal	Proximal_NON_Diffuse	3	1	2	3	Y	Y	Lost	Absent	Intact	Y	Y	9	9
RH10-528	GEJ	Intestinal	Proximal_NON_Diffuse	3	1	2	3	Y	N	Intact	Absent	Intact	Y	Y	18	28
RH10-529	GEJ	Intestinal	Proximal_NON_Diffuse	3	1	2	2	N	N	Intact	Normal	Loss	N	N	36	36
RH10-530	GEJ	Diffuse	Diffuse	3	1	2	2	N	N	Intact	Normal	Loss	N	N	20	20
RH10-531	GEJ	Intestinal	Proximal_NON_Diffuse	3	1	2	2	Y	N	Intact	Overexpressed	Intact	Y	Y	8	24
RH10-532	GEJ	Intestinal	Proximal_NON_Diffuse	4	2	3	2	N	Y	Intact	Absent	Intact	Y	Y	12	28
RH10-534	GEJ	Intestinal	Proximal_NON_Diffuse	3	1	2	2	N	N	Lost	Normal	Intact	Y	Y	5	15
RH10-535	Stomach	Diffuse	Diffuse	3	1	2	3	N	N	Intact	Normal	Intact	N	Y	18	18
RH10-536	GEJ	Mixed	Proximal_NON_Diffuse	3	1	2	3	Y	Y	Intact	Absent	Intact	Y	Y	6	7
RH10-537	Stomach	Intestinal	Distal_NON_Diffuse	3	1	2	3	N	N	Intact	Overexpressed	Intact	Y	Y	11	20
RH10-540	GEJ	Diffuse	Diffuse	3	2	3	3	N	N	Intact	Absent	Intact	Y	Y	13	16
RH10-541	GEJ	Intestinal	Proximal_NON_Diffuse	4	0	2	2	Y	N	Intact	Absent	Intact	Y	Y	8	14
RH10-549	GEJ	Intestinal	Proximal_NON_Diffuse	4	0	2	3	N	N	Intact	Absent	Intact	Y	Y	20	28
RH10-560	Stomach	Intestinal	Distal_NON_Diffuse	2	0	1	3	N	N	Lost	Absent	Intact	Y	Y	20	25
RH10-566	GEJ	Diffuse	Diffuse	3	3	3	3	N	N	Intact	Overexpressed	Loss	Y	Y	5	8
RH10-569	Stomach	Diffuse	Diffuse	4	3	3	3	N	N	Intact	Normal	Intact	Y	Y	14	19
RH10-571	GEJ	Mixed	Proximal_NON_Diffuse	3	2	3	2	Y	N	Intact	Absent	Intact	Y	Y	29	40
RH10-572	GEJ	Diffuse	Diffuse	3	1	2	2	Y	N	Intact	Normal	Intact	Y	Y	9	16
RH10-573	GEJ	Intestinal	Proximal_NON_Diffuse	3	1	2	2	N	N	Intact	Overexpressed	Intact	N	N	42	42
RH10-574	GEJ	Intestinal	Proximal_NON_Diffuse	3	1	2	3	N	Y	Intact	Overexpressed	Loss	N	N	47	47
RH10-575	Stomach	Mixed	Distal_NON_Diffuse	3	2	3	3	Y	N	Intact	Absent	Intact	Y	Y	7	10
RH10-576	Stomach	Diffuse	Diffuse	3	2	3	3	Y	N	Intact	Absent	Intact	N	Y	38	38
RH10-579	Stomach	Intestinal	Distal_NON_Diffuse	2	1	2	2	N	N	Intact	Absent	Loss	N	Y	5	5
RH10-581	Stomach	Intestinal	Distal_NON_Diffuse	2	2	2	3	N	Y	Intact	Absent	Intact	Y	Y	37	41
RH10-582	GEJ	Intestinal	Proximal_NON_Diffuse	2	2	2	3	N	N	Intact	Overexpressed	Intact	N	N	7	7
RH10-583	GEJ	Diffuse	Diffuse	2	2	2	3	N	N	Intact	Normal	Intact	N	N	10	10
RH10-584	GEJ	Diffuse	Diffuse	2	2	2	2	N	N	Intact	Overexpressed	Intact	Y	Y	14	23
RH10-585	GEJ	Intestinal	Proximal_NON_Diffuse	3	1	2	2	N	N	Intact	Overexpressed	Intact	Y	Y	4	6
RH10-587	GEJ	Diffuse	Diffuse	3	3	3	3	N	N	Intact	Overexpressed	Intact	N	Y	8	8
RH10-589	GEJ	Intestinal	Proximal_NON_Diffuse	3	3	3	1	N	N	Intact	Overexpressed	Intact	Y	Y	6	13
RH10-590	GEJ	Intestinal	Proximal_NON_Diffuse	4	2	3	1	N	N	Intact	Absent	Intact	Y	Y	5	8
RH10-591	GEJ	Diffuse	Diffuse	4	3	3	3	Y	N	Intact	Absent	Intact	Y	Y	3	5
RH10-609	GEJ	Intestinal	Proximal_NON_Diffuse	1	1	1	2	N	N	Lost	Overexpressed	Intact	Y	Y	26	38
RH10-610	Stomach	Diffuse	Diffuse	3	1	2	3	N	N	Intact	Absent	Intact	N	Y	28	28
RH10-611	GEJ	Intestinal	Proximal_NON_Diffuse	3	1	2	3	N	N	Intact	Absent	Intact	Y	Y	4	13
RH10-612	Stomach	Intestinal	Distal_NON_Diffuse	3	1	2	2	N	N	Intact	Absent	Intact	N	N	17	17
RH10-613	GEJ	Intestinal	Proximal_NON_Diffuse	3	1	2	3	N	Y	Intact	Overexpressed	Intact	Y	Y	6	13
RH10-614	GEJ	Mixed	Proximal_NON_Diffuse	3	1	2	3	N	N	Lost	Overexpressed	Loss	N	N	42	42
RH10-615	Stomach	Intestinal	Distal_NON_Diffuse	3	1	2	3	N	N	Lost	Normal	Intact	Y	Y	4	11
RH10-616	GEJ	Mixed	Proximal_NON_Diffuse	3	1	2	3	N	N	Intact	Overexpressed	Loss	Y	Y	12	18
RH10-617	GEJ	Intestinal	Proximal_NON_Diffuse	3	2	3	3	N	N	Intact	Absent	Intact	N	Y	13	13
RH10-618	GEJ	Mixed	Proximal_NON_Diffuse	3	2	3	3	N	N	Lost	Overexpressed	Intact	Y	Y	5	8
RH10-619	GEJ	Intestinal	Proximal_NON_Diffuse	3	3	3	3	Y	N	Intact	Overexpressed	Intact	Y	Y	9	14
