# Supplementary material for: Retrospective review using targeted deep sequencing reveals mutational differences between gastroesophageal junction and gastric carcinomas
Source: BMC Cancer. 2015 Feb 6;15:32. doi: 10.1186/s12885-015-1021-7 (PMC4322811; doi:10.1186/s12885-015-1021-7)
Supplement: Additional file 7: Table S7. — List of mutated genes in the TCGA gastric cancer dataset within regions that were amplified and sequenced in this study. [file 12885_2015_1021_MOESM7_ESM.xlsx]

## Sheet: Mutations
TCGA Sample ID	Anatomical Site	Mutations
TCGA-B7-5816	Fundus/Body	PTEN
TCGA-B7-5818	Fundus/Body	PIK3CA
TCGA-BR-4184	Antrum/Distal	EGFR,KRAS,MET,SMAD4,TP53
TCGA-BR-4187	Antrum/Distal
TCGA-BR-4253	Fundus/Body	PIK3CA,PTEN
TCGA-BR-4256	Antrum/Distal	FBXW7,TP53
TCGA-BR-4257	Antrum/Distal	ERBB4,KRAS,PTEN
TCGA-BR-4292	Fundus/Body	TP53
TCGA-BR-4294	Fundus/Body
TCGA-BR-4357	Fundus/Body	TP53
TCGA-BR-4363	Fundus/Body	STK11,TP53
TCGA-BR-4366	Antrum/Distal	CDKN2A,TP53
TCGA-BR-4368	Antrum/Distal	KRAS
TCGA-BR-4370	Antrum/Distal
TCGA-BR-6452	Fundus/Body	FGFR3,PIK3CA,PTEN,SMARCB1
TCGA-BR-6453	Fundus/Body
TCGA-BR-6455	Fundus/Body	NRAS,PIK3CA
TCGA-BR-6456	Fundus/Body	TP53
TCGA-BR-6457	Fundus/Body	TP53
TCGA-BR-6458	Fundus/Body	TP53
TCGA-BR-6563	Antrum/Distal	APC
TCGA-BR-6564	Fundus/Body	SMAD4
TCGA-BR-6565	Fundus/Body	TP53
TCGA-BR-6566	Fundus/Body	ERBB2
TCGA-BR-6705	Fundus/Body	KRAS
TCGA-BR-6707	Fundus/Body	PIK3CA,PTEN
TCGA-BR-6801	Fundus/Body
TCGA-BR-6802	Fundus/Body	KRAS,PIK3CA
TCGA-BR-6803	Fundus/Body	TP53
TCGA-BR-7197	Antrum/Distal	TP53
TCGA-BR-7703	Fundus/Body	KRAS,TP53
TCGA-BR-7707	Fundus/Body	GNAS,KRAS,TP53
TCGA-BR-7715	Fundus/Body	TP53
TCGA-BR-7716	Fundus/Body	TP53
TCGA-BR-7723	Fundus/Body
TCGA-BR-7851	Fundus/Body	FBXW7,PIK3CA
TCGA-BR-7957	Fundus/Body
TCGA-BR-7958	Fundus/Body
TCGA-BR-8058	Antrum/Distal
TCGA-BR-8059	Fundus/Body	KIT,KRAS
TCGA-BR-8077	Fundus/Body	TP53
TCGA-BR-8078	Fundus/Body	KRAS
TCGA-BR-8080	Fundus/Body	TP53
TCGA-BR-8081	Fundus/Body	PIK3CA
TCGA-BR-8284	Antrum/Distal	PIK3CA,PTEN
TCGA-BR-8286	Antrum/Distal	TP53
TCGA-BR-8289	Fundus/Body	TP53
TCGA-BR-8291	Antrum/Distal
TCGA-BR-8295	Fundus/Body	TP53
TCGA-BR-8296	Fundus/Body	TP53
TCGA-BR-8297	Fundus/Body	TP53
TCGA-BR-8360	Fundus/Body	FBXW7,FGFR3,PIK3CA,TP53
TCGA-BR-8361	Fundus/Body	SMAD4,TP53
TCGA-BR-8363	Antrum/Distal	RB1
TCGA-BR-8364	Fundus/Body
TCGA-BR-8365	Fundus/Body
TCGA-BR-8366	Fundus/Body	BRAF,KRAS,SMAD4
TCGA-BR-8367	Fundus/Body
TCGA-BR-8368	Fundus/Body	KRAS,PTEN,SMARCB1
TCGA-BR-8369	Antrum/Distal
TCGA-BR-8372	Fundus/Body	FBXW7,RET,SMAD4
TCGA-BR-8373	Fundus/Body
TCGA-BR-8380	Antrum/Distal	FBXW7
TCGA-BR-8381	Fundus/Body	PTEN
TCGA-BR-8382	Antrum/Distal
TCGA-BR-8384	Antrum/Distal
TCGA-BR-8483	Antrum/Distal
TCGA-BR-8484	Fundus/Body	TP53
TCGA-BR-8485	Fundus/Body	SMO
TCGA-BR-8486	Fundus/Body	TP53
TCGA-BR-8487	Antrum/Distal	CDKN2A,FBXW7,PIK3CA,PTEN,SMAD4,TP53,VHL
TCGA-BR-8588	Fundus/Body	PIK3CA
TCGA-BR-8589	Fundus/Body	CTNNB1
TCGA-BR-8590	Fundus/Body	TP53
TCGA-BR-8591	Antrum/Distal	PIK3CA,PTEN
TCGA-BR-8592	Fundus/Body
TCGA-BR-8676	Antrum/Distal	PIK3CA
TCGA-BR-8677	Antrum/Distal
TCGA-BR-8678	Fundus/Body	TP53
TCGA-BR-8679	Fundus/Body	KRAS,TP53
TCGA-BR-8680	Antrum/Distal	APC,FGFR2,KRAS,PIK3CA
TCGA-BR-8682	Antrum/Distal	TP53
TCGA-BR-8683	Antrum/Distal	TP53
TCGA-BR-8686	Antrum/Distal	PIK3CA
TCGA-BR-A44U	Antrum/Distal	TP53
TCGA-BR-A452	Antrum/Distal	TP53
TCGA-BR-A453	Antrum/Distal
TCGA-BR-A4CR	Fundus/Body	RB1,TP53
TCGA-BR-A4CS	Fundus/Body	TP53
TCGA-BR-A4IU	Antrum/Distal	TP53
TCGA-BR-A4IV	Antrum/Distal
TCGA-BR-A4IY	Antrum/Distal	TP53
TCGA-BR-A4IZ	Antrum/Distal
TCGA-BR-A4J1	Antrum/Distal
TCGA-BR-A4J2	Antrum/Distal
TCGA-BR-A4J4	Antrum/Distal
TCGA-BR-A4J7	Antrum/Distal
TCGA-BR-A4PD	Fundus/Body	TP53
TCGA-BR-A4PF	Antrum/Distal	FLT3,TP53
TCGA-BR-A4QI	Antrum/Distal	TP53
TCGA-BR-A4QL	Antrum/Distal	FBXW7,KRAS
TCGA-CD-5798	Antrum/Distal	KRAS
TCGA-CD-5799	Antrum/Distal	CDH1,CDKN2A,SMAD4,TP53
TCGA-CD-5800	Antrum/Distal	TP53
TCGA-CD-5801	Antrum/Distal	BRAF,PIK3CA
TCGA-CD-5803	Antrum/Distal
TCGA-CD-5804	Antrum/Distal	SMAD4,TP53
TCGA-CD-5813	Fundus/Body	TP53
TCGA-CD-8524	Antrum/Distal	TP53
TCGA-CD-8525	Antrum/Distal	TP53
TCGA-CD-8526	Fundus/Body	TP53
TCGA-CD-8527	Antrum/Distal
TCGA-CD-8528	Antrum/Distal	TP53
TCGA-CD-8529	Antrum/Distal	SMAD4
TCGA-CD-8530	Fundus/Body	TP53
TCGA-CD-8531	Fundus/Body	PTEN,TP53
TCGA-CD-8534	Antrum/Distal	ATM
TCGA-CD-8535	Fundus/Body	APC,KRAS,TP53
TCGA-CD-8536	Fundus/Body	APC,FBXW7,NOTCH1
TCGA-CD-A487	Antrum/Distal	TP53
TCGA-CD-A489	Antrum/Distal	NRAS,TP53
TCGA-CD-A48C	Antrum/Distal	TP53
TCGA-CD-A4MH	Antrum/Distal
TCGA-CD-A4MI	Antrum/Distal	PIK3CA
TCGA-CD-A4MJ	Fundus/Body	APC,FBXW7,KRAS
TCGA-CG-4300	Antrum/Distal	TP53
TCGA-CG-4305	Antrum/Distal	PIK3CA,PTEN
TCGA-CG-4306	Antrum/Distal	APC
TCGA-CG-4436	Stomach(NOS)
TCGA-CG-4438	Antrum/Distal	TP53
TCGA-CG-4440	Fundus/Body	TP53
TCGA-CG-4441	Fundus/Body
TCGA-CG-4442	Antrum/Distal	PIK3CA,RB1
TCGA-CG-4443	Fundus/Body
TCGA-CG-4444	Fundus/Body	FLT3,TP53
TCGA-CG-4449	Antrum/Distal	TP53
TCGA-CG-4462	Antrum/Distal
TCGA-CG-4465	Antrum/Distal
TCGA-CG-4469	Stomach(NOS)	ERBB4,TP53
TCGA-CG-4474	Antrum/Distal	FGFR2,PIK3CA
TCGA-CG-4475	Stomach(NOS)
TCGA-CG-4476	Fundus/Body	APC
TCGA-CG-5718	Fundus/Body	TP53
TCGA-CG-5719	Fundus/Body	KRAS,SMAD4
TCGA-CG-5721	Antrum/Distal	ATM,FBXW7,FLT3,PIK3CA,RB1,TP53
TCGA-CG-5722	Fundus/Body	PIK3CA
TCGA-CG-5724	Antrum/Distal
TCGA-CG-5726	Antrum/Distal	TP53
TCGA-CG-5727	Fundus/Body	CTNNB1,KRAS,SMO,TP53
TCGA-CG-5728	Antrum/Distal	CSF1R,PIK3CA,PTEN
TCGA-CG-5733	Antrum/Distal	FBXW7,PIK3CA
TCGA-CG-5734	Fundus/Body
TCGA-D7-5578	Fundus/Body	PIK3CA,TP53
TCGA-D7-5579	Fundus/Body
TCGA-D7-6520	Antrum/Distal	TP53
TCGA-D7-6521	Fundus/Body	TP53
TCGA-D7-6522	Antrum/Distal
TCGA-D7-6524	Antrum/Distal
TCGA-D7-6526	Antrum/Distal	TP53
TCGA-D7-6528	Fundus/Body	APC,TP53
TCGA-D7-6815	Fundus/Body	PIK3CA,SMAD4,TP53
TCGA-D7-6817	Fundus/Body	TP53
TCGA-D7-6818	Fundus/Body
TCGA-D7-6820	Fundus/Body	ERBB4,TP53
TCGA-D7-6822	Fundus/Body	CTNNB1,TP53
TCGA-D7-8572	Fundus/Body	CDH1
TCGA-D7-8573	Fundus/Body	CTNNB1
TCGA-D7-8574	Antrum/Distal	GNAS
TCGA-D7-8575	Fundus/Body	ATM
TCGA-D7-8576	Antrum/Distal	TP53
TCGA-D7-8578	Fundus/Body	TP53
TCGA-D7-8579	Antrum/Distal
TCGA-D7-A4YU	Fundus/Body	TP53
TCGA-D7-A4YV	Antrum/Distal	FBXW7,FLT3,PIK3CA
TCGA-D7-A4YX	Fundus/Body
TCGA-D7-A4YY	Antrum/Distal
TCGA-D7-A4Z0	Antrum/Distal
TCGA-EQ-5647	Antrum/Distal
TCGA-EQ-8122	Antrum/Distal	TP53
TCGA-EQ-A4SO	Antrum/Distal	KRAS
TCGA-F1-6177	Antrum/Distal	FGFR1,PIK3CA
TCGA-F1-6875	Antrum/Distal
TCGA-F1-A448	Antrum/Distal	FBXW7,VHL
TCGA-FP-7735	Fundus/Body	APC,PIK3CA,TP53
TCGA-FP-7916	Antrum/Distal	PIK3CA
TCGA-FP-7998	Fundus/Body	PIK3CA
TCGA-FP-8209	Antrum/Distal
TCGA-FP-8210	Antrum/Distal
TCGA-FP-A4BE	Fundus/Body	FGFR3,PTEN,TP53
TCGA-HF-7132	Antrum/Distal	FBXW7,TP53
TCGA-HJ-7597	Fundus/Body	NRAS,TP53
TCGA-HU-8243	Fundus/Body	SMAD4,TP53
TCGA-HU-8245	Fundus/Body	TP53
TCGA-HU-8249	Fundus/Body
TCGA-HU-8602	Antrum/Distal	FBXW7,FGFR2,PIK3CA
TCGA-HU-8604	Antrum/Distal	APC
TCGA-HU-8608	Fundus/Body	PIK3CA
TCGA-HU-8610	Fundus/Body
TCGA-HU-A4G2	Antrum/Distal
TCGA-HU-A4G3	Antrum/Distal
TCGA-HU-A4G8	Antrum/Distal	GNAS,KDR
TCGA-HU-A4G9	Fundus/Body
TCGA-HU-A4GC	Antrum/Distal
TCGA-HU-A4GD	Antrum/Distal	TP53
TCGA-HU-A4GF	Antrum/Distal	TP53
TCGA-HU-A4GH	Fundus/Body	TP53
TCGA-HU-A4GN	Antrum/Distal	FBXW7
TCGA-HU-A4GP	Antrum/Distal	TP53
TCGA-HU-A4GQ	Antrum/Distal	PIK3CA,SMARCB1,TP53
TCGA-HU-A4GT	Antrum/Distal	PTEN
TCGA-HU-A4GU	Antrum/Distal	PIK3CA,TP53
TCGA-HU-A4GX	Antrum/Distal	CDKN2A,PIK3CA,TP53
TCGA-HU-A4GY	Antrum/Distal
TCGA-HU-A4H0	Fundus/Body	ERBB2
TCGA-HU-A4H2	Antrum/Distal
TCGA-HU-A4H3	Fundus/Body	KRAS,PIK3CA,TP53
TCGA-HU-A4H4	Antrum/Distal	PIK3CA,SMAD4,TP53
TCGA-HU-A4H5	Fundus/Body	CTNNB1
TCGA-HU-A4H6	Antrum/Distal
TCGA-HU-A4H8	Antrum/Distal	CDKN2A,ERBB2,FLT3,SMARCB1
TCGA-HU-A4HD	Antrum/Distal
TCGA-BR-4183	Cardia/Proximal	TP53
TCGA-BR-4188	Cardia/Proximal
TCGA-BR-4201	Cardia/Proximal	BRAF,KRAS,PTEN,SMARCB1
TCGA-BR-4369	Cardia/Proximal
TCGA-BR-6454	Cardia/Proximal	PIK3CA
TCGA-BR-6706	Cardia/Proximal	PIK3CA
TCGA-BR-6710	Gastroesophageal-Junction
TCGA-BR-6852	Gastroesophageal-Junction	FBXW7,TP53
TCGA-BR-7196	Cardia/Proximal	PIK3CA
TCGA-BR-7717	Cardia/Proximal
TCGA-BR-7722	Gastroesophageal-Junction	SMAD4
TCGA-BR-7901	Gastroesophageal-Junction	TP53
TCGA-BR-7959	Cardia/Proximal
TCGA-BR-8370	Cardia/Proximal	KRAS,SMAD4
TCGA-BR-8371	Cardia/Proximal
TCGA-BR-8687	Cardia/Proximal	KIT,KRAS
TCGA-BR-8690	Cardia/Proximal
TCGA-BR-A44T	Cardia/Proximal
TCGA-BR-A4CQ	Cardia/Proximal	KRAS,TP53
TCGA-BR-A4J6	Cardia/Proximal	CTNNB1,SMAD4
TCGA-BR-A4J8	Cardia/Proximal	ERBB4,TP53
TCGA-BR-A4PE	Cardia/Proximal	TP53
TCGA-BR-A4QM	Cardia/Proximal
TCGA-CD-5802	Cardia/Proximal
TCGA-CD-8532	Cardia/Proximal
TCGA-CD-A486	Cardia/Proximal	TP53
TCGA-CD-A48A	Cardia/Proximal	TP53
TCGA-CD-A4MG	Cardia/Proximal	CSF1R
TCGA-CG-4301	Cardia/Proximal	ATM
TCGA-CG-4304	Cardia/Proximal
TCGA-CG-4437	Cardia/Proximal
TCGA-CG-4455	Cardia/Proximal
TCGA-CG-4466	Cardia/Proximal	TP53
TCGA-CG-4477	Cardia/Proximal
TCGA-CG-5717	Cardia/Proximal	TP53
TCGA-CG-5720	Cardia/Proximal	PIK3CA
TCGA-CG-5723	Cardia/Proximal	FBXW7,RB1,TP53
TCGA-CG-5730	Cardia/Proximal	TP53
TCGA-CG-5732	Cardia/Proximal	TP53
TCGA-D7-5577	Cardia/Proximal	PIK3CA,PTEN
TCGA-D7-6518	Gastroesophageal-Junction
TCGA-D7-6519	Cardia/Proximal
TCGA-D7-6525	Gastroesophageal-Junction	TP53
TCGA-D7-6527	Cardia/Proximal
TCGA-D7-8570	Cardia/Proximal
TCGA-D7-A4YT	Cardia/Proximal
TCGA-F1-6874	Cardia/Proximal
TCGA-FP-7829	Gastroesophageal-Junction	SMAD4,TP53
TCGA-FP-8099	Gastroesophageal-Junction	TP53
TCGA-FP-8211	Cardia/Proximal	APC
TCGA-FP-8631	Gastroesophageal-Junction	TP53
TCGA-FP-A4BF	Gastroesophageal-Junction	TP53
TCGA-HF-7133	Gastroesophageal-Junction
TCGA-HF-7136	Gastroesophageal-Junction	CDKN2A
TCGA-HU-A4G6	Cardia/Proximal	CTNNB1
TCGA-IN-7806	Gastroesophageal-Junction	TP53
TCGA-IN-7808	Gastroesophageal-Junction	TP53
TCGA-IN-8462	Gastroesophageal-Junction	TP53
TCGA-IN-8663	Gastroesophageal-Junction	ABL1,CDKN2A
TCGA-IP-7968	Gastroesophageal-Junction	TP53

## Sheet: Gene P Values
Gene	# Cardia samples w/ Mutation in Gene (Total=60)	# Non-Cardia samples w/ Mutation in Gene (Total=221)	raw-pValue	BH-corrected-pValue
ABL1	1	0	0.213523	1
AKT1	0	0	1	1
ALK	0	0	1	1
APC	1	10	0.466822	1
ATM	1	3	1	1
BRAF	1	2	0.514946	1
CDH1	0	2	1	1
CDKN2A	2	5	0.643841	1
CSF1R	1	1	0.382054	1
CTNNB1	2	5	0.643841	1
EGFR	0	1	1	1
ERBB2	0	3	1	1
ERBB4	1	3	1	1
FBXW7	2	16	0.379579	1
FGFR1	0	1	1	1
FGFR2	0	3	1	1
FGFR3	0	3	1	1
FLT3	0	5	0.588051	1
GNAS	0	3	1	1
HNF1A	0	0	1	1
HRAS	0	0	1	1
IDH1	0	0	1	1
JAK2	0	0	1	1
JAK3	0	0	1	1
KDR	0	1	1	1
KIT	1	1	0.382054	1
KRAS	4	21	0.61506	1
MET	0	1	1	1
MLH1	0	0	1	1
MPL	0	0	1	1
NOTCH1	0	1	1	1
NPM1	0	0	1	1
NRAS	0	3	1	1
PDGFRA	0	0	1	1
PIK3CA	5	39	0.107453	1
PTEN	2	15	0.540446	1
PTPN1	0	0	1	1
RB1	1	4	1	1
RET	0	1	1	1
SMAD4	4	13	0.76543	1
SMARCB1	1	4	1	1
SMO	0	2	1	1
SRC	0	0	1	1
STK11	0	1	1	1
TP53	22	94	0.461405	1
VHL	0	2	1	1
